# mtDNA diversity in human populations highlights the merit of haplotype matching in gene therapies

E.C. Røyrvik<sup>1\*</sup>, J.P. Burgstaller<sup>2,3</sup>, I.G. Johnston<sup>4†</sup>

<sup>1</sup>Division of Biomedical Sciences, Warwick Medical School, University of Warwick, Coventry CV4 7AL, UK, <sup>2</sup>Biotechnology in Animal Production, Department for Agrobiotechnology, IFA Tulln, 3430 Tulln, Austria, Institute of Animal Breeding and Genetics, University of Veterinary Medicine, Vienna, Veterinärplatz 1, 1210 Vienna, Austria, <sup>4</sup>School of Biosciences, University of Birmingham, Edgbaston, Birmingham B15 2TT, UK

Corresponding authors: \* e.royrvik@warwick.ac.uk ; † i.johnston.1@bham.ac.uk

## Abstract

Modern gene therapies aim to prevent the inheritance of mutant mitochondrial DNA (mtDNA) from mother to offspring by using a third-party mtDNA background. Technological limitations mean that these therapies may result in a small amount of maternal mtDNA admixed with a majority of third-party mtDNA. This situation is unstable if the mother's mtDNA experiences a proliferative advantage over the third-party mtDNA, in which case the efficacy of the therapy may be undermined. Animal models suggest that the likelihood of such a proliferative advantage increases with increasing genetic distance between mother and third-party mtDNA, but in real therapeutic contexts the genetic distance, and so the importance of this effect, remains unclear. Here we harness a large volume of available human mtDNA data to model random sampling of mother and third-party mtDNAs from real human populations. We show that even within the same haplogroup, genetic differences around 20-80 SNPs are common between mtDNAs. These values are sufficient to lead to substantial segregation in murine models, over an organismal lifetime, even given low starting heteroplasmy, inducing increases from 5% to 35% over one year. Randomly pairing mothers and third-party women in clinical contexts thus runs the risk that substantial mtDNA segregation will compromise the beneficial effects of the therapy. We suggest that choices of 'mtDNA donors' be based on recent shared maternal ancestry, or, preferentially, explicit haplotype matching, in order to reduce the potential for problems in the implementation of these therapies.

## Introduction

Mitochondria are small organelles within eukaryotic cells that are vital for the normal aerobic production of ATP, the 'universal' biochemical energy carrier. Each mitochondrion, of which there are many in any given cell, carries at least one copy of its own, small genome (mitochondrial or mtDNA), distinct from the large genome stored in the nucleus. While there are good reasons for retaining some genes in the mitochondrion (Johnston and Williams, 2016), a challenging biochemical environment and comparative lack of efficient DNA repair mechanisms allows a higher mutation rate there than in the nucleus (Alexeyev *et al.*, 2013).

Differences in the sequence of mitochondrial DNA can arise at the level of individuals (population diversity) or different mitochondria in the same cell (*heteroplasmy* – see below). In humans, mtDNA is inherited uniparentally, via the mother's egg cell; recombination is usually negligible between human mtDNAs

(Hagelberg, 2003, Hagstrom *et al.*, 2014). Given the non-recombining nature of the mitochondrial genome, such polymorphisms as exist can be expressed in terms of a straightforward phylogenetic tree (see Fig. 1A). The sum of polymorphisms in an mtDNA sequence is known as a haplotype, and any hierarchical clade of haplotypes is a haplogroup. Since inheritance is uniparental, mtDNA haplogroups are strongly susceptible to genetic drift, and this has given rise to pronounced haplogroup pattern differences between geographical areas, especially on a continental scale (see Fig. 1B).

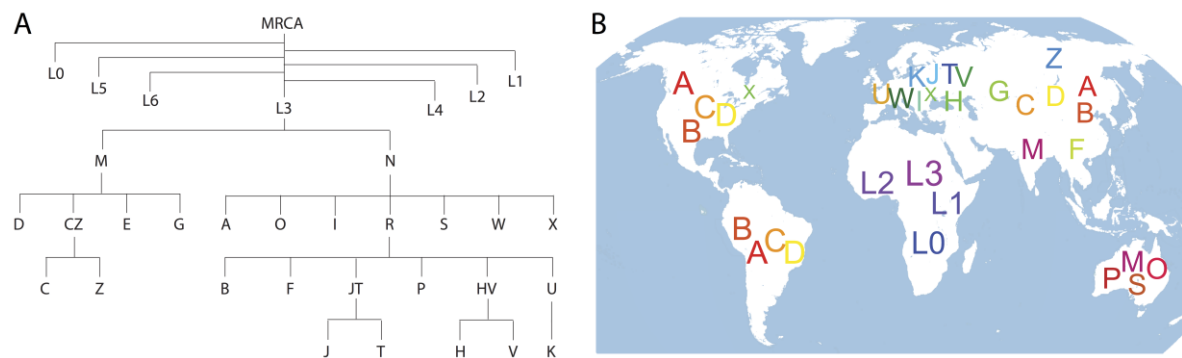

**Figure 1. A) Relationship between human mtDNA haplogroups.** Haplogroup labels and tree structure for human mtDNA groups; *MRCA* is most recent common ancestor. **B) Typical haplogroups in pre-colonial human populations by approximate geography.** We have omitted higher-order haplogroups of which many sub-groups are presented (e.g. *N* & *R*). Based on data from MitoMAP (Lott *et al.*, 2013) and references therein.

While most mitochondrial diversity in humans is neutral or near-neutral (Chinnery and Hudson, 2013), certain mtDNA mutations in humans can cause fatal, incurable diseases (for example, mt3243A>G, causing the inherited disease MELAS), often manifesting when the proportion of mutated mtDNA molecules in a cellular population exceeds a threshold (Taylor and Turnbull, 2005, Wallace and Chalkia, 2013). Clinical approaches to prevent the inheritance of diseases resulting from damaging mutations in mtDNA are a focus of current medical research. Cutting-edge therapies including pronuclear transfer and chromosomal spindle transfer attempt to address the inheritance of mutant mtDNA from a maternal carrier by transferring the nuclear genome (either as the pair of pronuclei or the chromosomal spindle) into an enucleated third-party oocyte or enucleated zygote with non-pathogenic mtDNA (Brown *et al.*, 2006, Burgstaller *et al.*, 2015, Craven *et al.*, 2010, Tachibana *et al.*, 2009) (Fig. 2). These therapies thus aim to place parental nuclear DNA on a healthy mitochondrial background with no mtDNA from the mother present. However, technological limitations currently mean that *carryover* is possible, whereby some of the mother's mtDNA may be carried into the third-party cell with the transferred nuclear genetic material. These therapies can thus lead to the coexistence of several distinct sequences within cellular mtDNA populations. First, the non-pathogenic mtDNA from the third-party oocyte donor is present. Second, due to carryover, non-pathogenic mtDNA from the mother may be present. Third, due to carryover, pathogenic (mutant) mtDNA from the mother may be present (Fig. 2).

**Therapy:** nuclear genetic material of the parents (with some cytoplasm) transferred to enucleated third-party cell

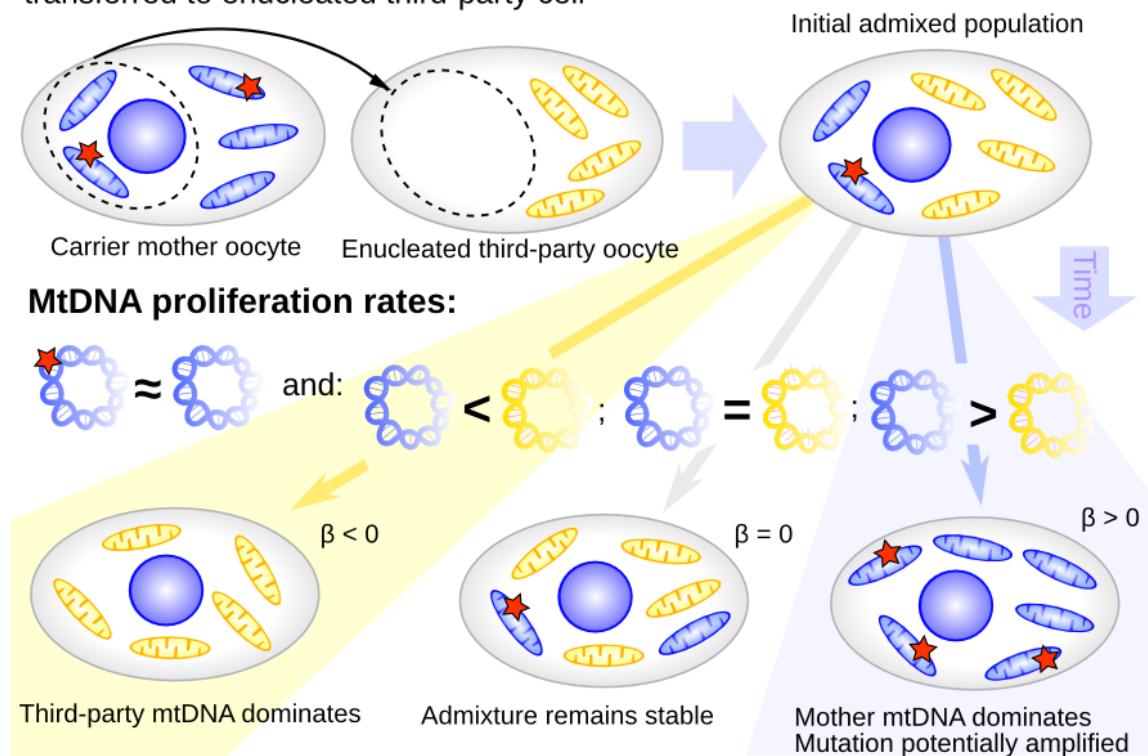

**Figure 2. mtDNA segregation and gene therapies.** A mother may possess two similar haplotypes, one wild type (blue) and one mutant (blue with red star). Therapies attempt to use a third-party with a potentially different mtDNA haplotype (yellow) to provide a healthy mtDNA background. Carryover in these therapies may result in an admixture of wildtype mother, mutant mother, and wildtype third-party mtDNA in a cell. If the two haplotypes (blue and yellow) proliferate differently, the offspring may evolve a predominance of third-party (lower left) or mother (lower right) mtDNA with time. In the latter case, if mutated mtDNA proliferates at a similar rate to its 'carrier' haplotype, the damaging mutation may be amplified to harmful levels in cells.

This admixture is stable if mother and oocyte donor mtDNA experience no proliferative differences (Fig. 2, centre), and if the oocyte donor haplotype experiences a proliferative advantage then carried-over mtDNA will generally be reduced over time (Fig. 2 left). However, a general proliferative advantage of the mother's haplotype can in principle lead to the amplification of the associated pathological mutation, working against the desired effect of the therapy to remove this mutation (Fig. 2 right). This amplification can in principle occur even if the pathological mutation experiences a selective disadvantage – if this disadvantage is of lower magnitude than the proliferative difference between haplotypes, the latter effect will still dominate.

It has been shown that in cellular admixtures in mice (and other species), such proliferative differences between haplotypes do indeed commonly exist (Fig. 2; a selection of models and studies exhibiting this behaviour is given in (Burgstaller *et al.*, 2015)). It has also been demonstrated that, while the direction and tissue-dependence of this differential proliferation are currently difficult to predict, its expected magnitude depends on the genetic difference between haplotypes (Burgstaller *et al.*, 2014) (Fig. 3). An important question to consider in gene therapies is thus, given the mtDNA diversity in human populations, what genetic

differences are likely to arise in nuclear mother-oocyte donor pairings in therapeutic contexts, and are the proliferative differences in Fig. 2 thus likely to arise?

If  $\Pi_{ij}$  is the number of non-identical bases between two mtDNA genomes,  $i$  and  $j$ , then, intuitively, identical mtDNAs ( $\Pi_{ij} = 0$ ) would be expected to behave identically, but the more different the mtDNAs ( $\Pi_{ij} > 0$ ), the larger is the proliferative difference generally expected between the two. We define *heteroplasmy*,  $h$ , as the proportion of one 'foreign' mtDNA haplotype in a cellular admixture: hence, if a cell contains  $H_0$  mtDNAs of its 'native' haplotype and  $H_1$  mtDNAs of a 'foreign' haplotype,  $h = H_1/(H_0 + H_1)$ .

Proliferative differences between haplotypes can be measured as a quantity  $\beta$  a rate of proliferation of one mtDNA over another. In this picture, heteroplasmy  $h(t)$  is a function of an initial heteroplasmy  $h(t=0)$  and time  $t$ , with  $\beta$  describing the rate of change of heteroplasmy:  $h(t) = \frac{1}{1 + \frac{(1-h(t=0))e^{-\beta t}}{h(t=0)}}$ . High  $\beta$  values correspond to high

proliferative differences ( $H_1$  dominating over  $H_0$ ), and hence high probabilities of amplification of one mtDNA type with time. For example, proliferative differences of average magnitude  $|\beta| \approx 0.008$  per day have been measured between two mtDNA types of  $\Pi_{ij} \approx 100$  in the livers of mice; this value of  $\beta$  corresponds to an amplification of  $h$  from 0.05 (5% of one haplotype) to 0.49 (49% of that same haplotype) over one year (Burgstaller *et al.*, 2014).

A subset of recent evidence for proliferative differences between mtDNA haplotypes in mice is shown in Fig. 3. Fig. 3A shows inferred values of  $|\beta|$ , and the magnitude of proliferative differences between mtDNAs, in a variety of tissues for three mtDNA pairs (where  $\Pi_{ij} = 18, 86$ , and  $107$ ). Fig. 3B shows the predictions that this behaviour of  $\beta$  makes about absolute changes in heteroplasmy, for two putative admixtures beginning with 5% and 20% of a 'foreign' haplotype. For example, a haplotype differing from the 'native' type by  $\Pi_{ij} \approx 100$  may readily experience amplification from 5% to 50% over one year.

For simplicity, these plots are limited to the behaviour over one year, but the trends are observed to continue throughout organismal lifetimes. For example, one observation in (Burgstaller *et al.*, 2014) showed heteroplasmy in liver tissue rising from 5.9% to 81.8% over 680 days for a particular mtDNA pairing where  $\Pi_{ij} = 108$ . There is thus evidence that, in mice, nucleotide differences around  $\Pi_{ij} \sim 100$  are associated with proliferative differences capable of amplifying an admixed haplotype from a 5% minority to a pronounced cellular majority over the course of an organismal lifetime. But what are standard values of  $\Pi_{ij}$  in actual human populations? And is this magnitude of genetic diversity expected to give rise to clinically relevant mtDNA behaviour, given that a mutant mtDNA load of 40-60% is often sufficient to cause morbidity, and it still poorly known what 'safe' levels may be in most cases (Wallace and Chalkia, 2013)?

Existing studies have characterised the nucleotide differences in contemporary human populations, finding typical differences of dozens of nucleotides across modern Europeans (Fu *et al.*, 2012), greater diversity in Africa than in Europe (Briggs *et al.*, 2009), and results confirming and expanding these observations across a broader geographical range (Lippold *et al.*, 2014). A modern workflow has





modern population mixing, from different geographical regions is available via MitoMAP (Lott *et al.*, 2013). These data can be used to estimate the probability that an individual with maternal ancestry from a given region belongs to a given haplogroup.

Many specific mtDNA sequences corresponding to individual humans belonging to a given haplogroup are available via NCBI. Using these data, we sought to identify the expected genetic differences between pairs of individual, real human mtDNAs. To estimate these expected differences, we first characterised the expected differences between specific mtDNA samples within and between different haplogroups. For the purposes of this study we employ the convention that an individual is marked as a member of haplogroup category  $\mathcal{H}$  if it is (a) a member of  $\mathcal{H}$  and (b) **not** a member of any haplogroup that is a subgroup of  $\mathcal{H}$ . For example,  $x$  is labelled as  $L$  if  $x$  is in haplogroup  $L$  but not in any of the  $A, B, C, D, E, \dots$  that are subgroups of  $L$ .

We obtained the  $> 30k$  mtDNA sequences available from NCBI Nucleotide database (NCBI, 2015). Of these sequences  $\sim 7.6k$  had straightforwardly interpretable haplogroup information, where the initial letter of the */haplogroup* field was taken to be the haplogroup label. We categorised these records by this initial letter, then employed the following sampling protocol. Given a pair of haplogroups  $\{\mathcal{H}_1, \mathcal{H}_2\}$ , we picked at random a sequence belonging to  $\mathcal{H}_1$  and picked at random a sequence belonging to  $\mathcal{H}_2$  (ensuring that the two sequences were not the same sample if  $\mathcal{H}_1 = \mathcal{H}_2$ ). We used BLAST to record the number of sequence differences between these specific sampled sequences. For the purposes of this report we recorded the number of non-identical bases as the nucleotide difference  $\prod_{ij}$ ; we also note that indels commonly exist between sampled mtDNA sequences, further contributing to mtDNA diversity. We then built up a distribution of sequence differences over many ( $n=1000$ ) sampled pairs of specific human mtDNAs from the given pair of haplogroups.

To connect more explicitly with medical policy, we next changed the scale of our analysis from haplogroups *per se* to the estimated haplogroup profiles of real human populations. First, we employed heuristic data from the MitoMAP project (Lott *et al.*, 2013) estimating the haplogroup makeup of pre-colonial populations from different regions of the world, while noting that the actual census populations will usually have a very different makeup, especially in New World countries that experienced extensive overseas colonization. For each region, we randomly chose two haplogroups, each with a probability corresponding to that haplogroup's representation in the region of interest. We then randomly chose two specific mtDNA sequences from those two haplogroups. As above, we then used BLAST to determine the genetic difference between those specific sequences. We repeated this process many times to build up an expected distribution of the genetic differences between two randomly chosen members of the human population from that region.

As the UK is on the cusp of implementing gene therapies based on nuclear transfer, we then performed a more rigorous, population-based analysis for Britain. In order to estimate the probable levels of nucleotide diversity ( $\prod_{ij}$ ) in mtDNA between two randomly selected British women, and hence the likely magnitude of proliferative differences between their mtDNA, a haplogroup profile of Britain was assembled,

based on over 4,600 individuals. The majority of the UK samples represent ethnic Britons. To account for the fact that the modern UK population consists of many ethnicities, approximations of mtDNA haplogroup distributions for the two largest cities in the UK (London and Birmingham) were also constructed. These distributions are estimates, based on data from the 2011 census, immigration data, and published mtDNA haplogroup data for areas from which there has been mass immigration into the UK (see SI for details).

For each ethnic census category, an estimate of probable haplogroup composition was created (see SI for details on calculations), and the frequency values scaled by the numerical census data to yield expected haplogroup frequencies in London and Birmingham. For simplicity, the single letter level of nomenclature is used, with the exception of superhaplogroup *L*, for which its subgroups *L0-3* are included.

## Results

Fig. 4A shows the resulting statistics on differences between sampled mtDNA sequences between haplogroup pairs. Several intuitive features are immediately observable. First, haplogroup *L* displays noticeably more intra-haplogroup differences than any other haplogroup. *L* haplogroups constitute the majority of African haplogroups (and have very deep branching times relative to non-African haplogroups) and are thus expected to include the most genetic diversity (Behar *et al.*, 2008). Second, with the exception of *L*, diagonal elements (i.e. samples from a haplogroup compared to samples from the same haplogroup) show less diversity than off-diagonal elements (i.e. samples from a haplogroup compared to samples from a different haplogroup). Third, haplogroup pairings which are expected to be similar (for example, sister clades *H* and *V*) show decreased genetic diversity. The inset shows a breakdown of the *L* haplogroup into its immediate subgroups.

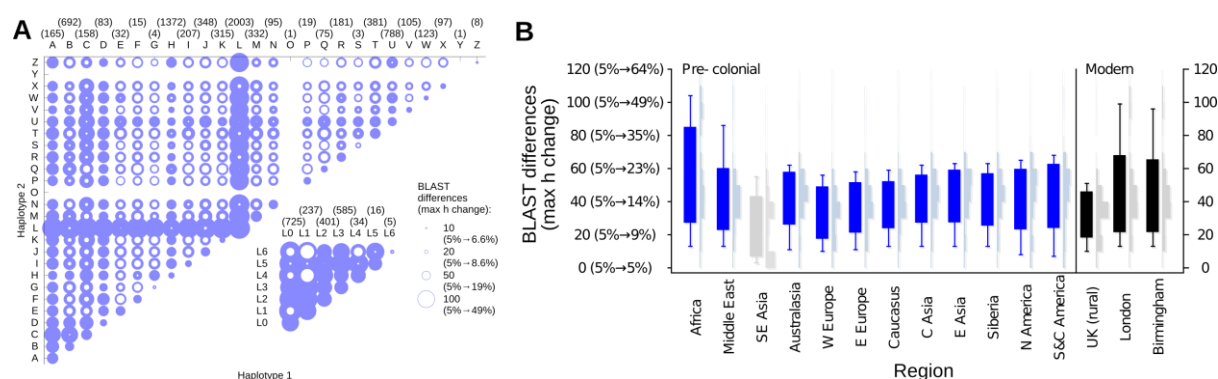

**Figure 4. A) MtDNA differences between haplogroups.** The maximum (outer halo) and minimum (inner halo) nucleotide differences expected between a pair of randomly sampled mtDNA sequences (horizontal and vertical axes). The diagonal corresponds to pairs within the same haplogroup; off-diagonal elements correspond to pairs of mtDNAs from different haplogroups. Dataset size for each haplogroup is given in brackets;  $n=1000$  samples were used for each pairing. Max  $h$  change shows, for a given magnitude of genetic diversity, the maximum expected change in heteroplasmy over one year starting at 5%, based on mouse models (Fig 3). As described in the text, haplotype labels denote sequences that fall within a given category and not within any named subcategories of that category. Inset shows subgroups of the most-diverse *L* haplogroup. **B) MtDNA differences between geographical regions.** In blue, genetic differences between a pair of individuals randomly sampled from sets modelling populations within a given region of the world, using the MitoMAP (Lott *et al.*, 2013) estimation of the (pre-colonial) haplogroup profile of different geographical regions. In black, expected differences in the general the modern non-urban UK population, and populations of London and Birmingham. Candlesticks show minimum, mean  $\pm$  s.d., and maximum nucleotide

differences between simulated pairs sampled from geographical regions. Explicit sample distributions are given in lighter colours; max h change gives maximum expected change in heteroplasmy as in (A). SE Asia (in grey) has poorly characterised MitoMAP estimates.

A notable result from this analysis is that between haplogroups, differences of ~50 SNPs are common, and, even within haplogroups, differences of ~20 SNPs are common. This level of diversity may not seem substantial when compared to the ~16 kilobases of total human mtDNA, but we draw attention to our previous observations that differences of ~20 SNPs were enough to induce significant proliferative differences between haplotypes in mice, who also have a ~16kb mtDNA genome (Burgstaller *et al.*, 2014). As shown in parentheses in Fig. 4A, the magnitudes of  $\Delta$  that likely emerge from pairwise haplotype samples match those responsible for dramatic mtDNA heteroplasmy changes in mouse models.

Fig. 4A also provides a means of identifying a ‘partner’ for a given haplogroup that minimizes  $\Delta$  and hence the likelihood of damaging segregation. For example, given a mother with haplogroup B and a choice between donors from C, V, and L, Fig.4A shows that the B-V pairing minimizes maximum  $\Delta$ , and thus affords the lowest risk of high segregation (see Discussion).

Table 1 gives the estimated haplogroup makeup of the UK and two major cities, based on a combination of census and immigration data and a survey of worldwide mtDNA sequences (see Methods and SI). We underline that these quantities are principled estimates, but the summary statistics that arise from these estimates are robust to variation in the exact population frequencies, and is consistent with the behaviour expected from an ethnically mixed population based on more direct estimates (see below).

**Table 1. Estimated haplogroup frequencies in the British population** UK – majority ethnic Britons, exclusive of large urban areas, London, Birmingham –census and immigration data based estimates (see SI).

| HG | UK %  | London % | Birmingham % |
|----|-------|----------|--------------|
| A  | 0.0%  | 0.6%     | 0.5%         |
| B  | 0.0%  | 1.1%     | 0.7%         |
| C  | 0.0%  | 0.3%     | 0.2%         |
| D  | 0.0%  | 0.8%     | 0.5%         |
| F  | 0.0%  | 1.1%     | 0.8%         |
| G  | 0.0%  | 0.2%     | 0.2%         |
| H  | 45.2% | 30.4%    | 29.9%        |
| I  | 4.1%  | 2.6%     | 2.6%         |
| J  | 12.4% | 7.8%     | 8.2%         |
| K  | 8.3%  | 5.1%     | 5.3%         |
| L0 | 0.0%  | 1.3%     | 0.8%         |
| L1 | 0.0%  | 2.4%     | 1.9%         |
| L2 | 0.0%  | 4.9%     | 3.8%         |
| L3 | 0.1%  | 4.5%     | 3.5%         |



|       |       |       |       |
|-------|-------|-------|-------|
| M     | 0.0%  | 10.4% | 12.7% |
| N     | 0.0%  | 0.1%  | 0.2%  |
| O     | 0.0%  | 0.0%  | 0.0%  |
| P     | 0.0%  | 0.0%  | 0.0%  |
| R     | 0.1%  | 2.7%  | 3.6%  |
| S     | 0.0%  | 0.0%  | 0.0%  |
| T     | 10.5% | 6.8%  | 6.9%  |
| U     | 12.6% | 11.5% | 12.6% |
| V     | 3.2%  | 1.6%  | 1.8%  |
| W     | 1.5%  | 1.2%  | 1.6%  |
| X     | 1.8%  | 1.2%  | 1.1%  |
| other | 0.3%  | 1.3%  | 0.6%  |

Fig. 4B illustrates the distribution of nucleotide differences between individuals sampled from geographical regions, and rural vs. urban UK based on estimates in Table 1, in this manner. It is immediately noticeable that pairs of individuals from Africa generally exhibit more diversity than pairs chosen from other regions, but it is striking that the expected genetic difference in many geographic regions is around  $\Pi_{ij} \sim 40\text{-}50$  SNPs, often with a range between 10-100 SNPs. The substantial diversity expected in the UK and its cities is of a consistent magnitude with that expected from its population history, involving admixtures of African and Asian immigrants in addition to its original European state. Again, parenthesized numbers in Fig. 4B illustrate that these magnitudes of  $\Pi$  are readily able to induce pronounced heteroplasmy shifts in mice. Taken together, these results demonstrate that expected levels of mtDNA diversity in modern human populations are of comparable magnitude to those responsible for substantial segregation bias in a existing mammalian models, and so therapies that randomly pair women from these populations may be subject to potentially detrimental heteroplasmy changes over time.

## Discussion

Our analysis clearly shows that, even within a geographical region restricted to the point of being dominated by a single mtDNA haplogroup, a  $\Pi_{ij} = 10 - 100$  is expected between randomly sampled individuals from that region. On a continental scale, expected differences are highest in Africa, as predicted from our knowledge of human population history, and comparably lower elsewhere. Comparably high, however, are the differences in the largest urban populations of the UK, where oocyte donor therapies will be implemented.

In mice, proliferative differences between haplogroups with  $\Pi_{ij} \sim 100$  were sufficient in some tissues to cause amplification of one mtDNA type from 0.05 to 0.64 (i.e. a small representation to a notable majority) over an organismal lifetime (Fig. 2B). There remains a wide range of questions involving the mapping from the murine model to the human system. One criticism of our argument may be that mtDNA segregation in humans may progress more slowly than in mice, reducing the

magnitude of the effects we consider. However, segregation in humans has been observed to occur more rapidly than in mice (Wallace and Chalkia, 2013). Furthermore, evidence exists for pronounced segregation of a pathological mutation over very short times during embryo-fetal development (Monnot *et al.*, 2011), suggesting the presence of mechanisms in humans that support fast segregation, and which could in principle also act on non-pathological mutations. Even in a conservative picture where mtDNA turnover rates are scaled by organismal lifetimes, amplification over the (longer) human lifetime will still be anticipated by analogy with the murine system. An important clinical example of the potentially high mtDNA segregation in human disease (again involving a pathological mutation) is described in Ref. (Mitalipov *et al.*, 2014), in which an embryo selected for its low (12%) load of the 3243 mutation (Treff *et al.*, 2012) developed into an infant with >40% loads in blood and urine at six weeks of age, presenting with a range of (possibly unrelated) metabolic pathologies.

It is worth noting that, in addition to the unpredictability of segregation direction, the rate at which mtDNA segregation occurs is not simple and constant – rather, it can depend on tissue type, organismal age and developmental stage (Burgstaller *et al.*, 2014), and complicating processes including the mtDNA bottleneck (Johnston *et al.*, 2015). It is thus not unreasonable to think that the ‘averaged’ rates reported here may be underestimates for a particular time period. We therefore highlight that, even from a conservative calculation of segregation rates, *the likely genetic differences between humans randomly sampled from a population may well allow substantial amplification of a disease-carrying mtDNA haplotype over the timescale of a human lifetime.*

We must also consider whether randomly sampling NCBI sequences is a good model for the mtDNA pairings likely to be involved in gene therapies. The counterexample of this would be a population consisting of many individuals with identical mtDNA sequences and a small number of individuals with different sequences. The NCBI, which assigns records to unique sequences, will likely have one record for the common sequence and one each for the rare different sequences. In this case, uniformly sampling the NCBI would underestimate the population fraction with the common sequence, and thus tend to overestimate mtDNA diversity. However, the ubiquity of many-SNP differences between records (see Fig.4) suggests that this problematic population structure is unlikely, and indeed, several contemporary studies have observed differences between each individual sample (Fu *et al.*, 2012, Lippold *et al.*, 2014). Additionally, socio-economic factors will give rise to structure in the pairings in clinical applications (which may either decrease or increase the expected  $\prod_{ij}$ ). Despite these complications, we consider our approximations appropriate for considering first-order bounds of likely behaviour in these populations exhibiting realistic human diversity.

The danger of pathological mutations ‘hitchhiking’ on favoured haplotypes and being amplified along with the haplotype is described in the introduction and has been discussed previously (Burgstaller *et al.*, 2014, Burgstaller *et al.*, 2015). An additional danger is the amplification of an initially rare mtDNA haplotype to the point where it competes with the dominant mtDNA type in a cell and causes pathologies through mismatched protein subunits or other mechanisms (Burgstaller *et al.*, 2015). The co-occurrence in a cell of two different, but both separately non-pathogenic, mtDNAs

has been observed to result in adverse physiological changes (Sharpley *et al.*, 2012). Segregation between mtDNA haplotypes, allowing an initially rare haplotype to proliferate and become amplified within a cell, has the potential to manifest and exacerbate both of these potential issues.

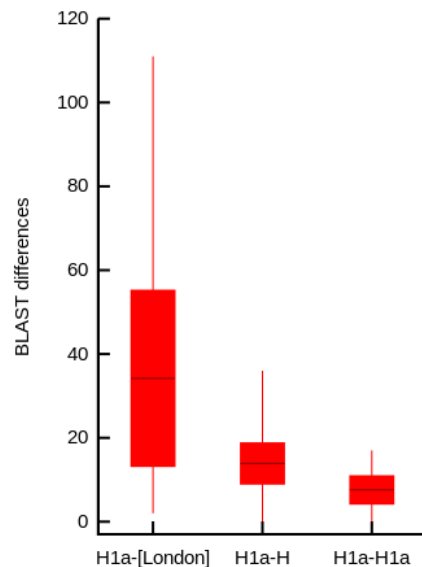

**Figure 5. MtDNA differences expected with different haplotype matching strategies for a mother with haplogroup H1a.** Distributions of nucleotide differences (min, mean  $\pm$  sd, max) expected when pairing mtDNA from haplogroup H1a with randomly sampled mtDNA from our estimated London population, with randomly sampled mtDNA from haplogroup H, and with randomly sampled mtDNA from haplogroup H1a.

To diminish the likelihood of potentially harmful mtDNA segregation, which we argue is likely given the mtDNA diversity in the modern UK population, we urge experts involved in the implementation of these therapies to consider ‘haplotype matching’, i.e. choosing an oocyte donor with mtDNA as similar as possible to the mother’s in clinical approaches. Methods to match haplotypes (minimise  $\Pi_{ij}$ ) could include choosing maternal relatives of the mother with low or zero proportions of the pathological mutation under consideration, or choosing donors from a haplogroup as similar as possible to the mother’s. To illustrate this latter strategy, Fig. 5 shows the range of expected  $\Pi$  values that could arise when a third-party donor is paired with a mother from haplogroup H1a. If no haplotype matching is employed, and the third-party donor is randomly sampled from our estimated London population, a maximum  $\Pi$  around 100 is possible (due to the pronounced population diversity illustrated in Fig. 4B). Choosing a donor from haplogroup H decreases this maximum value to around 36 (that is, the maximal within-H diversity, shown on the diagonal of Fig. 4A). More detailed matching, specifically choosing another H1a woman as the third-party, further limits the maximum  $\Pi$  to approximately 17. These lower values achieved through haplotype matching dramatically decrease the expected potential heteroplasmy changes (for example, in mice (Fig 2), from a maximum of 5%  $\rightarrow$  49% over one year for  $\Pi = 100$  to 5%  $\rightarrow$  8% over one year for  $\Pi = 17$ ), thus immediately limiting the potential for detrimental segregation. Our results, and future findings from more detailed studies, can help provide a strategy for this matching process – given a mother of known mtDNA haplogroup, choose from available oocyte donors so as to minimise the maximum genetic distance given in Fig. 4. Such haplotype matching, which is in principle technically straightforward and economically marginal,

decreases the risk of inadvertently choosing an mtDNA pairing which experiences substantial proliferative differences, and thus decreases the risk of manifestation of the disease the therapy was implemented to prevent.

## References

Alexeyev M, Shokolenko I, Wilson G, LeDoux S (2013) The maintenance of mitochondrial DNA integrity--critical analysis and update. Cold Spring Harbor perspectives in biology 5, a012641.

Behar DM, Villems R, Soodyall H, Blue-Smith J, Pereira L, Metspalu E, Scozzari R, Makkan H, Tzur S, Comas D *et al.* (2008) The dawn of human matrilineal diversity. American journal of human genetics 82, 1130-40.

Blanco R, Mayordomo E, Montoya J, Ruiz-Pesini E (2011) Rebooting the human mitochondrial phylogeny: an automated and scalable methodology with expert knowledge. BMC bioinformatics 12, 174.

Briggs AW, Good JM, Green RE, Krause J, Maricic T, Stenzel U, Lalueza-Fox C, Rudan P, Brajkovic D, Kucan Z *et al.* (2009) Targeted retrieval and analysis of five Neandertal mtDNA genomes. Science 325, 318-21.

Brown DT, Herbert M, Lamb VK, Chinnery PF, Taylor RW, Lightowlers RN, Craven L, Cree L, Gardner JL, Turnbull DM (2006) Transmission of mitochondrial DNA disorders: possibilities for the future. Lancet 368, 87-9.

Burgstaller JP, Johnston IG, Jones NS, Albrechtova J, Kolbe T, Vogl C, Futschik A, Mayrhofer C, Klein D, Sabitzer S *et al.* (2014) MtDNA segregation in heteroplasmic tissues is common in vivo and modulated by haplotype differences and developmental stage. Cell reports 7, 2031-41.

Burgstaller JP, Johnston IG, Poulton J (2015) Mitochondrial DNA disease and developmental implications for reproductive strategies. Molecular human reproduction 21, 11-22.

Chinnery PF, Hudson G (2013) Mitochondrial genetics. British medical bulletin 106, 135-59.

Craven L, Tuppen HA, Greggains GD, Harbottle SJ, Murphy JL, Cree LM, Murdoch AP, Chinnery PF, Taylor RW, Lightowlers RN *et al.* (2010) Pronuclear transfer in human embryos to prevent transmission of mitochondrial DNA disease. Nature 465, 82-5.

Fu Q, Rudan P, Paabo S, Krause J (2012) Complete mitochondrial genomes reveal neolithic expansion into Europe. PloS one 7, e32473.

Hagelberg E (2003) Recombination or mutation rate heterogeneity? Implications for Mitochondrial Eve. Trends Genet 19, 84-90.

Hagstrom E, Freyer C, Battersby BJ, Stewart JB, Larsson NG (2014) No recombination of mtDNA after heteroplasmy for 50 generations in the mouse maternal germline. *Nucleic Acids Res* 42, 1111-6.

Johnston IG, Burgstaller JP, Havlicek V, Kolbe T, Rulicke T, Brem G, Poulton J, Jones NS (2015) Stochastic modelling, Bayesian inference, and new in vivo measurements elucidate the debated mtDNA bottleneck mechanism. *eLife* 4.

Johnston IG, Williams BP (2016) Evolutionary Inference across Eukaryotes Identifies Specific Pressures Favoring Mitochondrial Gene Retention. *Cell Systems* 2, 101-11.

Lippold S, Xu H, Ko A, Li M, Renaud G, Butthof A, Schroder R, Stoneking M (2014) Human paternal and maternal demographic histories: insights from high-resolution Y chromosome and mtDNA sequences. *Investig Genet* 5, 13.

Lott MT, Leipzig JN, Derbeneva O, Xie HM, Chalkia D, Sarmady M, Procaccio V, Wallace DC (2013) mtDNA Variation and Analysis Using Mitomap and Mitomaster. *Current protocols in bioinformatics / editorial board, Andreas D Baxeavanis [et al]* 44, 1 23 1-6.

Mitalipov S, Amato P, Parry S, Falk MJ (2014) Limitations of preimplantation genetic diagnosis for mitochondrial DNA diseases. *Cell reports* 7, 935-7.

Monnot S, Gigarel N, Samuels DC, Burlet P, Hesters L, Frydman N, Frydman R, Kerbrat V, Funalot B, Martinovic J *et al.* (2011) Segregation of mtDNA throughout human embryofetal development: m.3243A>G as a model system. *Human mutation* 32, 116-25.

NCBI (2015) <http://www.ncbi.nlm.nih.gov/nuccore/?term=%28015400%5BSLEN%5D:016700%5BSLEN%5D%29+AND+Homo%5BOrganism%5D+AND+mitochondrion%5BFILT%5D+NOT+%28Homo+sp.+Altai+OR+Denisova+hominin+OR+neanderthalensis+OR+heidelbergensis+OR+consensus+OR+ancient+human+remains%29>.

Sharpley MS, Marciniak C, Eckel-Mahan K, McManus M, Crimi M, Waymire K, Lin CS, Masubuchi S, Friend N, Koike M *et al.* (2012) Heteroplasmy of mouse mtDNA is genetically unstable and results in altered behavior and cognition. *Cell* 151, 333-43.

Tachibana M, Sparman M, Sritanaudomchai H, Ma H, Clepper L, Woodward J, Li Y, Ramsey C, Kolotushkina O, Mitalipov S (2009) Mitochondrial gene replacement in primate offspring and embryonic stem cells. *Nature* 461, 367-72.

Taylor RW, Turnbull DM (2005) Mitochondrial DNA mutations in human disease. *Nature reviews Genetics* 6, 389-402.

Treff NR, Campos J, Tao X, Levy B, Ferry KM, Scott RT, Jr. (2012) Blastocyst preimplantation genetic diagnosis (PGD) of a mitochondrial DNA disorder. *Fertility and sterility* 98, 1236-40.



Wallace DC, Chalkia D (2013) Mitochondrial DNA genetics and the heteroplasmy conundrum in evolution and disease. Cold Spring Harbor perspectives in biology 5, a021220.

## Supplementary Information

### I. UK city mtDNA haplogroup compositions

In order to produce a realistic approximation of the mitochondrial haplogroup composition of the two largest UK cities, London and Birmingham, an approach based on ethnic categories in the 2011 UK census and mt haplogroup data from corresponding regions and/or countries was employed.

Ethnic composition data were downloaded from <http://webarchive.nationalarchives.gov.uk>, in which 18 categories were defined (see Table 1 for these category definitions and their frequencies in London and Birmingham).

**Table 1.** Proportion of different census categories in London and Birmingham

| Code  | Category                              | Sub-category                                  | London (%) | B'ham (%) |
|-------|---------------------------------------|-----------------------------------------------|------------|-----------|
| Pop1  | White                                 | English/Welsh/Scottish/Northern Irish/British | 44.8       | 53.1      |
| Pop2  | White                                 | Irish                                         | 2.2        | 2.1       |
| Pop3  | White                                 | Gypsy or Irish Traveller                      | 0.1        | 0         |
| Pop4  | White                                 | Other White                                   | 12.6       | 2.7       |
| Pop5  | Mixed/multiple ethnic group           | White and Black Caribbean                     | 1.5        | 2.3       |
| Pop6  | Mixed/multiple ethnic group           | White and Black African                       | 0.8        | 0.3       |
| Pop7  | Mixed/multiple ethnic group           | White and Asian                               | 1.2        | 1         |
| Pop8  | Mixed/multiple ethnic group           | Other Mixed                                   | 1.4        | 0.8       |
| Pop9  | Asian/Asian British                   | Indian                                        | 6.6        | 6         |
| Pop10 | Asian/Asian British                   | Pakistani                                     | 2.7        | 13.5      |
| Pop11 | Asian/Asian British                   | Bangladeshi                                   | 2.7        | 3         |
| Pop12 | Asian/Asian British                   | Chinese                                       | 1.5        | 1.2       |
| Pop13 | Asian/Asian British                   | Other Asian                                   | 4.9        | 2.9       |
| Pop14 | Black/African/Caribbean/Black British | African                                       | 7          | 2.8       |
| Pop15 | Black/African/Caribbean/Black British | Caribbean                                     | 4.2        | 4.4       |
| Pop16 | Black/African/Caribbean/Black British | Other                                         | 2.1        | 1         |
| Pop17 | Other ethnic group                    | Arab                                          | 1.3        | 1         |
| Pop18 | Other ethnic group                    | Any other ethnic group                        | 2.1        | 1         |

Then, for each ethnic category suitable mtDNA datasets were collated (see Table 2 for resultant haplogroup profiles).

**Table 2.** Estimated haplogroup frequencies in UK census categories.

| HG    | Pop 1  | Pop 2  | Pop 3  | Pop 4  | Pop 5  | Pop 6  | Pop 7  | Pop 8 | Pop 9  | Pop 10 | Pop 11 | Pop 12 | Pop 13 | Pop 14 | Pop 15 | Pop 16 | Pop 17 | Pop 18 |
|-------|--------|--------|--------|--------|--------|--------|--------|-------|--------|--------|--------|--------|--------|--------|--------|--------|--------|--------|
| A     | 0.0 %  | 0.0 %  | 0.0 %  | 0.0 %  | 0.1 %  | 0.0 %  | 1.4 %  | n/a   | 0.0 %  | 0.1 %  | 10.0 % | 5.3 %  | 2.7 %  | 0.0 %  | 0.3 %  | 0.1 %  | 0.1 %  | n/a    |
| B     | 0.0 %  | 0.0 %  | 0.0 %  | 0.0 %  | 0.1 %  | 0.0 %  | 5.2 %  | n/a   | 0.2 %  | 0.4 %  | 0.0 %  | 20.5 % | 10.4 % | 0.0 %  | 0.3 %  | 0.1 %  | 0.0 %  | n/a    |
| C     | 0.0 %  | 0.0 %  | 0.0 %  | 0.0 %  | 0.0 %  | 0.0 %  | 1.1 %  | n/a   | 0.5 %  | 0.0 %  | 0.0 %  | 3.8 %  | 2.1 %  | 0.0 %  | 0.0 %  | 0.0 %  | 0.0 %  | n/a    |
| D     | 0.0 %  | 0.0 %  | 0.0 %  | 0.0 %  | 0.3 %  | 0.0 %  | 3.9 %  | n/a   | 0.1 %  | 0.0 %  | 0.0 %  | 15.3 % | 7.7 %  | 0.0 %  | 0.5 %  | 0.3 %  | 0.0 %  | n/a    |
| F     | 0.0 %  | 0.0 %  | 0.0 %  | 0.0 %  | 0.0 %  | 0.0 %  | 4.8 %  | n/a   | 1.1 %  | 1.2 %  | 0.0 %  | 18.0 % | 9.6 %  | 0.0 %  | 0.0 %  | 0.0 %  | 0.0 %  | n/a    |
| G     | 0.0 %  | 0.0 %  | 0.0 %  | 0.0 %  | 0.0 %  | 0.0 %  | 0.8 %  | n/a   | 0.8 %  | 0.6 %  | 0.0 %  | 2.4 %  | 1.6 %  | 0.0 %  | 0.0 %  | 0.0 %  | 0.0 %  | n/a    |
| H     | 45.2 % | 50.7 % | 50.7 % | 48.1 % | 22.7 % | 24.4 % | 23.2 % | n/a   | 2.5 %  | 11.2 % | 0.0 %  | 0.0 %  | 1.3 %  | 3.6 %  | 0.3 %  | 1.9 %  | 24.1 % | n/a    |
| I     | 4.1 %  | 3.0 %  | 3.0 %  | 2.9 %  | 2.0 %  | 2.4 %  | 2.1 %  | n/a   | 0.2 %  | 0.7 %  | 0.0 %  | 0.0 %  | 0.1 %  | 0.8 %  | 0.0 %  | 0.4 %  | 1.4 %  | n/a    |
| J     | 12.4 % | 11.0 % | 11.0 % | 9.2 %  | 6.4 %  | 6.5 %  | 6.5 %  | n/a   | 1.5 %  | 3.5 %  | 0.0 %  | 0.0 %  | 0.7 %  | 0.6 %  | 0.5 %  | 0.6 %  | 11.2 % | n/a    |
| K     | 8.3 %  | 12.3 % | 12.3 % | 5.2 %  | 4.1 %  | 4.4 %  | 4.3 %  | n/a   | 0.7 %  | 1.1 %  | 0.0 %  | 0.0 %  | 0.3 %  | 0.5 %  | 0.0 %  | 0.2 %  | 5.4 %  | n/a    |
| L0    | 0.0 %  | 0.0 %  | 0.0 %  | 0.0 %  | 2.5 %  | 5.8 %  | 0.0 %  | n/a   | 0.0 %  | 0.1 %  | 0.0 %  | 0.0 %  | 0.0 %  | 11.6 % | 5.0 %  | 8.3 %  | 2.1 %  | n/a    |
| L1    | 0.0 %  | 0.0 %  | 0.0 %  | 0.0 %  | 9.8 %  | 7.2 %  | 0.0 %  | n/a   | 0.0 %  | 0.0 %  | 0.0 %  | 0.0 %  | 0.0 %  | 14.3 % | 19.5 % | 17.0 % | 1.9 %  | n/a    |
| L2    | 0.0 %  | 0.0 %  | 0.0 %  | 0.0 %  | 19.4 % | 15.1 % | 0.0 %  | n/a   | 0.0 %  | 0.5 %  | 0.0 %  | 0.0 %  | 0.0 %  | 29.9 % | 38.8 % | 34.5 % | 4.7 %  | n/a    |
| L3    | 0.1 %  | 0.0 %  | 0.0 %  | 0.0 %  | 16.5 % | 14.1 % | 0.0 %  | n/a   | 0.0 %  | 1.3 %  | 0.0 %  | 0.0 %  | 0.0 %  | 27.8 % | 33.0 % | 30.5 % | 7.8 %  | n/a    |
| M     | 0.0 %  | 0.0 %  | 0.0 %  | 0.0 %  | 0.4 %  | 1.8 %  | 20.5 % | n/a   | 54.3 % | 38.1 % | 66.7 % | 27.6 % | 40.9 % | 3.5 %  | 0.8 %  | 2.1 %  | 4.0 %  | n/a    |
| N     | 0.0 %  | 0.0 %  | 0.0 %  | 0.0 %  | 0.0 %  | 0.1 %  | 0.3 %  | n/a   | 0.1 %  | 1.3 %  | 0.0 %  | 1.2 %  | 0.6 %  | 0.1 %  | 0.0 %  | 0.1 %  | 4.3 %  | n/a    |
| O     | 0.0 %  | 0.0 %  | 0.0 %  | 0.0 %  | 0.0 %  | 0.0 %  | 0.0 %  | n/a   | 0.0 %  | 0.0 %  | 0.0 %  | 0.0 %  | 0.0 %  | 0.0 %  | 0.0 %  | 0.0 %  | 0.0 %  | n/a    |
| P     | 0.0 %  | 0.0 %  | 0.0 %  | 0.0 %  | 0.0 %  | 0.0 %  | 0.0 %  | n/a   | 0.0 %  | 0.0 %  | 0.0 %  | 0.0 %  | 0.0 %  | 0.0 %  | 0.0 %  | 0.0 %  | 0.0 %  | n/a    |
| R     | 0.1 %  | 0.3 %  | 0.3 %  | 0.0 %  | 0.1 %  | 0.2 %  | 5.7 %  | n/a   | 18.0 % | 12.5 % | 6.7 %  | 4.4 %  | 11.2 % | 0.3 %  | 0.0 %  | 0.1 %  | 10.4 % | n/a    |
| S     | 0.0 %  | 0.0 %  | 0.0 %  | 0.0 %  | 0.0 %  | 0.0 %  | 0.0 %  | n/a   | 0.0 %  | 0.0 %  | 0.0 %  | 0.0 %  | 0.0 %  | 0.0 %  | 0.0 %  | 0.0 %  | 0.0 %  | n/a    |
| T     | 10.5 % | 7.0 %  | 7.0 %  | 9.7 %  | 5.2 %  | 5.7 %  | 5.6 %  | n/a   | 1.3 %  | 3.1 %  | 0.0 %  | 0.0 %  | 0.6 %  | 0.8 %  | 0.0 %  | 0.4 %  | 7.2 %  | n/a    |
| U     | 12.6 % | 12.3 % | 12.3 % | 17.0 % | 6.8 %  | 7.5 %  | 10.1 % | n/a   | 15.4 % | 20.5 % | 16.7 % | 0.0 %  | 7.7 %  | 2.3 %  | 1.0 %  | 1.7 %  | 10.3 % | n/a    |
| V     | 3.2 %  | 0.0 %  | 0.0 %  | 0.1 %  | 1.6 %  | 1.7 %  | 1.6 %  | n/a   | 0.0 %  | 0.0 %  | 0.0 %  | 0.0 %  | 0.0 %  | 0.1 %  | 0.0 %  | 0.1 %  | 1.1 %  | n/a    |
| W     | 1.5 %  | 0.0 %  | 0.0 %  | 0.2 %  | 0.7 %  | 0.8 %  | 1.5 %  | n/a   | 3.2 %  | 3.3 %  | 0.0 %  | 0.0 %  | 1.6 %  | 0.2 %  | 0.0 %  | 0.1 %  | 1.0 %  | n/a    |
| X     | 1.8 %  | 0.7 %  | 0.7 %  | 2.0 %  | 0.9 %  | 1.0 %  | 0.9 %  | n/a   | 0.0 %  | 0.2 %  | 0.0 %  | 0.0 %  | 0.0 %  | 0.2 %  | 0.0 %  | 0.1 %  | 1.7 %  | n/a    |
| other | 0.3 %  | 2.7 %  | 2.7 %  | 5.7 %  | 0.3 %  | 1.4 %  | 0.6 %  | n/a   | 0.2 %  | 0.0 %  | 0.0 %  | 1.5 %  | 0.8 %  | 2.5 %  | 0.3 %  | 1.4 %  | 1.2 %  | n/a    |

**Pop1 White: English/Welsh/Scottish/Northern Irish/British**

These are frequencies from majority ethnic Britons, largely from rural areas, derived from over 4600 individuals (Helgason *et al.* , 2001, Røyrvik, unpublished).

**Pop2 White: Irish**

Data from 300 individuals, from (Achilli *et al.* , 2007), originally from (McEvoy *et al.* , 2004).

**Pop3 White: Gypsy or Irish Traveller**

Same as Pop3, given the lack of qualitative genetic differentiation between Traveller and non-Traveller Irish (Relethford and Crawford, 2013). Note that this category does not include Roma.

**Pop4 White: Other White**

These frequencies are composed of 50% pan-European average frequencies and 50% Polish frequencies, to take account of the large Polish communities in London (see <http://www.migrationobservatory.ox.ac.uk/briefings/migrants-uk-overview> ) and Birmingham, where Poles are 29% of this category. Variations in upper-hierarchy haplogroup frequencies are comparatively minor within Europe, and the New World white populations – derived as they primarily are from European parental populations – deviate little from European averages. Data from (Achilli *et al.*, 2007), comprising 10 970 individuals.

**(For ‘Mixed/multiple ethnic group’ categories, see below.)**

**Pop9 Asian/Asian British: Indian**

This is a weighted composite of different frequencies from 2126 individuals from the Indian subcontinent (Dubut *et al.* , 2009), based on major regions from which immigrants to the UK originated (Chanda and Ghosh, 2013). Weighting was as follows: Punjab – 45%, Kerala, Tamil Nadu, Andra Pradesh and Gujarat – 13.75% each.

**Pop10 Asian/Asian British: Pakistani**

This unweighted composite of 818 individuals includes all Pakistani groups from (Quintana-Murci *et al.* , 2004), as well as Indian Punjabis and Kashmiris from (Dubut *et al.*, 2009), as people hereditarily from the latter two geographic regions constitute by far the largest Pakistani sub-populations in the UK (TheChangeInstitute, 2009).

**Pop11 Asian/Asian British: Bangladeshi**

From 30 individuals from (Dubut *et al.*, 2009).

**Pop12 Asian/Asian British: Chinese**

These frequencies are from 2398 southern Chinese individuals from (Xue *et al.* , 2008), as the majority of immigration has traditionally been from southern China (Pharaoh, 2009). While this has perhaps changed (Pharaoh, 2009), for the purposes of our study, the differences in haplogroup composition, at our level of refinement, would not change materially.

**Pop13 Asian/Asian British: Other Asian**

Defined as 50% Pop9, 50% Pop12. While the composition/ethnicity of different ‘other’ Asian groups is unknown, the Chinese and Indian samples, taken together, should for our purposes adequately represent the majority of East Asia, South Asia and Southeast Asia. Central Asia, with its higher frequencies of typically ‘West Eurasian’ haplogroups, may be underrepresented, but at a small fraction of 4.9-2.9%, this will not substantially affect our calculations, especially as these haplogroups are well represented in Pops1-4.

**Pop14 Black/African/Caribbean/Black British: African**

This is a weighted composite of different frequencies from the African continent, scaled as 55% Western and Central African, 41% South and East African, and 3% North African (see (Owen, unpublished) for details on the origins of African immigrants to the UK). Sources for African regional and national haplogroup frequencies are (Fendt *et al.* , 2012, Kivisild *et al.* , 2004, Plaza *et al.* , 2003, Salas *et al.* , 2002, Saunier *et al.* , 2009). Note that North Africans are also included in pop17.

**Pop15      Black/African/Caribbean/Black British: Caribbean**

From (Deason *et al.* , 2012), 400 individuals representing Jamaica. The vast majority of haplogroups are typical of Sub-Saharan Africa, but a small minority are likely the result of European (H, J, U) and Taino (A, B, D) ancestry.

**Pop16      Black/African/Caribbean/Black British: Other**

These frequencies are composed of 50% pop14 and 50% pop15.

**Pop 17      Other ethnic group: Arab**

Base frequencies from (Badro *et al.* , 2013) for 3248 individuals. Haplogroup frequencies are weighted averages of 33.3% each from the Arabian Peninsula, the Middle East, and Africa north of the Sahara.

**Pop18      Other ethnic group: Other**

As there is no basis for estimating haplogroup frequencies for this category (2.1% in London, 1.0% in Birmingham), it has not been included in the analysis.

**Pop5      Mixed/multiple ethnic group: White and Black Caribbean**

These frequencies are composed of 50% Pop1 and 50% Pop15. This assumes that the census respondents' mothers are equally likely to be 'White' or 'Black Caribbean', which may not be the case.

**Pop6      Mixed/multiple ethnic group: White and Black African**

These frequencies are composed of 50% Pop1 and 50% Pop14. This assumes that the census respondents' mothers are equally likely to be 'White' or 'Black African', which may not be the case.

**Pop7      Mixed/multiple ethnic group: White and Asian**

These frequencies are composed of 50% Pop1 and 50% Pop13. This assumes that the proportion of census respondents' mothers are equally likely to be 'White' or 'Asian', which may not be the case.

**Pop8      Mixed/multiple ethnic group: Other Mixed**

As there is no basis for estimating haplogroup frequencies for this category (1.4% in London, 0.8% in Birmingham), it has not been included in the analysis.

Note that minority haplogroups from any given sample population are often not assayed in the original source, so the 'other' category by necessity has some small overlap with the other haplogroups in the table for different groups. The maximum proportion of 'other' haplogroups is just 1.27% (in London), so it is not expected to bias the overall dataset unduly.

## Supplementary Information References

Achilli A, Olivieri A, Pala M, Metspalu E, Fornarino S, Battaglia V, Accetturo M, Kutuev I, Khusnutdinova E, Pennarun E *et al.* (2007) Mitochondrial DNA variation of modern Tuscans supports the near eastern origin of Etruscans. *American journal of human genetics* 80, 759-68.

Badro DA, Douaihy B, Haber M, Youhanna SC, Salloum A, Ghassibe-Sabbagh M, Johnsrud B, Khazen G, Matisoo-Smith E, Soria-Hernanz DF *et al.* (2013) Y-chromosome and mtDNA genetics reveal significant contrasts in affinities of modern Middle Eastern populations with European and African populations. *PloS one* 8, e54616.

Chanda R, Ghosh S (2013) The Punjabi Diaspora in the UK: An Overview of Characteristics and Contributions to India, CARIM-India RR 2013/08. Robert Schuman Centre for Advanced Studies, San Domenico di Fiesole (FI): European University Institute.

Deason ML, Salas A, Newman SP, Macaulay VA, St AMEY, Pitsiladis YP (2012) Interdisciplinary approach to the demography of Jamaica. *BMC evolutionary biology* 12, 24.

Dubut V, Murail P, Pech N, Thionville MD, Cartault F (2009) Inter- and extra-Indian admixture and genetic diversity in reunion island revealed by analysis of mitochondrial DNA. *Ann Hum Genet* 73, 314-34.

Fendt L, Rock A, Zimmermann B, Bodner M, Thye T, Tschentscher F, Owusu-Dabo E, Gobel TM, Schneider PM, Parson W (2012) MtDNA diversity of Ghana: a forensic and phylogeographic view. *Forensic Sci Int Genet* 6, 244-9.

Helgason A, Hickey E, Goodacre S, Bosnes V, Stefansson K, Ward R, Sykes B (2001) mtDNA and the islands of the North Atlantic: estimating the proportions of Norse and Gaelic ancestry. *American journal of human genetics* 68, 723-37.

Kivisild T, Reidla M, Metspalu E, Rosa A, Brehm A, Pennarun E, Parik J, Geberhiwot T, Usanga E, Villems R (2004) Ethiopian mitochondrial DNA heritage: tracking gene flow across and around the gate of tears. *American journal of human genetics* 75, 752-70.

McEvoy B, Richards M, Forster P, Bradley DG (2004) The Longue Duree of genetic ancestry: multiple genetic marker systems and Celtic origins on the Atlantic facade of Europe. *American journal of human genetics* 75, 693-702.

Owen D (unpublished) African migration to the UK. [https://http://www.google.co.uk/url?sa=t&rct=j&q=&esrc=s&source=web&cd=1&cad=rja&uact=8&ved=0ahUKEwiWnufU6u\\_LAhUHow4KHV8RDWEQFggdMAA&url=https%3A%2F%2Fwww2.warwick.ac.uk%2Ffac%2Fsoc%2Fcrer%2Fevents%2Fafican%2F](https://http://www.google.co.uk/url?sa=t&rct=j&q=&esrc=s&source=web&cd=1&cad=rja&uact=8&ved=0ahUKEwiWnufU6u_LAhUHow4KHV8RDWEQFggdMAA&url=https%3A%2F%2Fwww2.warwick.ac.uk%2Ffac%2Fsoc%2Fcrer%2Fevents%2Fafican%2F)



[2Fconfp\\_david\\_owen.ppt&usg=AFQjCNEWDLvQzhy1YcK1Wxh1NKx-77tamQ&sig2=i3v9qAbv5qZxTlenIESOBQ](https://www.researchgate.net/publication/312287777).

Pharaoh R (2009) Migration, Integration, Cohesion - New Chinese Migrants to London.

Plaza S, Calafell F, Helal A, Bouzerna N, Lefranc G, Bertranpetit J, Comas D (2003) Joining the pillars of Hercules: mtDNA sequences show multidirectional gene flow in the western Mediterranean. *Ann Hum Genet* 67, 312-28.

Quintana-Murci L, Chaix R, Wells RS, Behar DM, Sayar H, Scozzari R, Rengo C, Al-Zahery N, Semino O, Santachiara-Benerecetti AS *et al.* (2004) Where west meets east: the complex mtDNA landscape of the southwest and Central Asian corridor. *American journal of human genetics* 74, 827-45.

Relethford JH, Crawford MH (2013) Genetic drift and the population history of the Irish travellers. *American journal of physical anthropology* 150, 184-9.

Røyrvik EC (unpublished).

Salas A, Richards M, De la Fe T, Lareu MV, Sobrino B, Sanchez-Diz P, Macaulay V, Carracedo A (2002) The making of the African mtDNA landscape. *American journal of human genetics* 71, 1082-111.

Saunier JL, Irwin JA, Strouss KM, Ragab H, Sturk KA, Parsons TJ (2009) Mitochondrial control region sequences from an Egyptian population sample. *Forensic Sci Int Genet* 3, e97-103.

TheChangelInstitute (2009) The Pakistani Muslim Community in England - Understanding Muslim Ethnic Communities. Wetherby.

Xue F, Wang Y, Xu S, Zhang F, Wen B, Wu X, Lu M, Deka R, Qian J, Jin L (2008) A spatial analysis of genetic structure of human populations in China reveals distinct difference between maternal and paternal lineages. *European journal of human genetics* : EJHG 16, 705-17.
